# Supplementary material for: Exploring the Challenges and Problems of Learning and Teaching Chinese/Mandarin language to Undergraduate Students: Voices from Non-Chinese Speaker Teachers and Learners
Source: Research Square preprint supplement (doi:10.21203/rs.3.rs-3304409/v1), 2023-09-01
Supplement: Supplementary file 1 [file c667dc00b51e32b51aef57cc.docx]

**Appendix: Interview Checklist**

Can you describe any linguistic challenges you've encountered while teaching or learning the Chinese/Mandarin language? How have these challenges impacted the teaching or learning process?

In your opinion, what are the most complex aspects of Chinese/Mandarin linguistics that pose difficulties for non-native speakers? How do you address these challenges in your teaching or learning strategies?

Have you noticed any particular phonetic or tonal aspects of Chinese/Mandarin that prove challenging for learners? How do you approach teaching or mastering these features?

Are there specific grammatical structures or syntax in the Chinese/Mandarin language that students often struggle with? How do you help students overcome these hurdles?

From an educational perspective, what instructional methods have you found most effective in teaching Chinese/Mandarin to undergraduate students? How do you tailor your teaching approach to address the unique challenges of this language?

What strategies do you use to engage students and maintain their motivation when teaching or learning Chinese/Mandarin, especially considering its linguistic complexities?

Given the cultural differences between Chinese/Mandarin and other languages, how do you address the challenges of promoting effective communication and cultural understanding in the classroom?

Have you encountered any obstacles related to curriculum development or teaching materials when teaching Chinese/Mandarin to non-native speakers? How do you adapt materials to suit diverse learning needs?

Learning a new language can be mentally demanding. Could you share experiences where students or teachers have faced psychological challenges such as frustration or anxiety when learning or teaching Chinese/Mandarin? How have you supported them in overcoming these hurdles?

Cultural adaptation and overcoming language barriers can sometimes lead to a sense of isolation or self-doubt. How do you foster a supportive and inclusive environment for non-native speakers of Chinese/Mandarin, both in the classroom and outside?
